# Supplementary material for: Agility testing in amateur soccer: A pilot study of selected physical and perceptual-cognitive contributions
Source: PLoS One. 2021 Jun 24;16(6):e0253819. doi: 10.1371/journal.pone.0253819 (PMC8224952; doi:10.1371/journal.pone.0253819)
Supplement: S1 Table — (XLSX) [file pone.0253819.s001.xlsx]

## Sheet: Raw data
Player ID	Agility [s]	5-m sprint [s]	10-m sprint [s]	30-m sprint [s]	Change of direction [s]	Perceptual-cognitive deficit [s]
1	3.01	0.9	1.67	4.04	2.32	0.69
2	3.17	1.01	1.85	4.61	2.45	0.72
3	3.11	0.91	1.69	4.23	2.29	0.83
4	3.08	0.99	1.74	4.35	2.4	0.68
5	3.09	0.94	1.66	4.18	2.38	0.71
6	3.16	0.97	1.75	4.32	2.38	0.78
7	3.13	0.94	1.73	4.25	2.43	0.7
8	3.15	1.02	1.82	4.6	2.43	0.72
9	3.3	1.11	1.94	4.81	2.53	0.78
10	3.1	1.04	1.78	4.42	2.39	0.71
11	3.13	1.03	1.84	4.6	2.34	0.79
12	3.1	1.09	1.86	4.49	2.39	0.71
13	3.15	1.13	1.92	4.57	2.47	0.69
14	2.97	0.97	1.79	4.26	2.32	0.65
15	3.17	1.05	1.8	4.24	2.43	0.74
